# Supplementary material for: Long-term comparative effectiveness of antihypertensive monotherapies in primary prevention of cardiovascular events: a population-based retrospective inception cohort study in the Netherlands
Source: HighWire-hosted journal article supplement (doi:10.1136/bmjopen-2022-068721), 2023-08-01

**Supplemental table S1. List of abbreviations**

| Full name                             | Abbreviation |
|---------------------------------------|--------------|
| ACE inhibitors                        | ACEIs        |
| Analysis of variance                  | ANOVA        |
| Anatomical therapeutic chemical code  | ATC code     |
| Angiotensin II receptor blockers      | ARBs         |
| Beta-blockers                         | BBs          |
| Calcium channel blockers              | CCBs         |
| Cardiac drug therapy                  | CDT          |
| Cardiovascular                        | CV           |
| Cardiovascular disease                | CVD          |
| Chronic obstructive pulmonary disease | COPD         |
| Confidence interval                   | CI           |
| European Society of Cardiology        | ESC          |
| Hazard ratio                          | HR           |
| Inverse probability weighting         | IPW          |
| Number needed to treat                | NNT          |
| Person-years                          | py           |
| Relative risk                         | RR           |
| Rheumatoid arthritis                  | RA           |
| Standard deviations                   | SD           |
| World Health Organization             | WHO          |

**Supplemental table S2. ATC codes used in our study**

| All mentioned diseases and medications                                        | ATC code         |
|-------------------------------------------------------------------------------|------------------|
| <b>Anti-hypertensive drug monotherapies</b>                                   |                  |
| ACEIs                                                                         | C09A             |
| ARBs                                                                          | C09C             |
| BBs                                                                           | C07A             |
| CCBs                                                                          | C08C, C08D, C08E |
| Thiazides                                                                     | C03AA            |
| <b>Anti-hyperlipidemic drug monotherapies</b>                                 |                  |
| HMG CoA reductase inhibitors                                                  | C10AA            |
| Fibrates                                                                      | C10AB            |
| Bile acid sequestrants                                                        | C10AC            |
| Nicotinic acid and derivatives                                                | C10AD            |
| Other lipid modifying agents                                                  | C10AX            |
| <b>Antihypertensive drug fixed-dose combinations</b>                          |                  |
| Thiazides and potassium in combination                                        | C03AB            |
| Thiazides, combinations with psycholeptics and/or analgesics                  | C03AH            |
| Thiazides, combinations with other drugs                                      | C03AX            |
| Calcium channel blockers and diuretics                                        | C08G             |
| Angiotensin converting enzyme inhibitors and combinations                     | C09B             |
| Angiotensin II receptor blockers and combinations                             | C09D             |
| Beta blocking agents and thiazides                                            | C07B             |
| Beta blocking agents and other diuretics                                      | C07C             |
| Beta blocking agents, thiazides and other diuretics                           | C07D             |
| Beta blocking agents and vasodilators                                         | C07E             |
| Beta blocking agents, other combinations                                      | C07F             |
| <b>Anti-hyperlipidemic drug fixed-dose combinations</b>                       |                  |
| HMG CoA reductase inhibitors in combination with other lipid modifying agents | C10BA            |
| HMG CoA reductase inhibitors, other combinations                              | C10BX            |
| <b>Secondary prevention</b>                                                   |                  |
| Platelet aggregation inhibitor                                                | B01AC            |
| Vitamin K antagonist                                                          | B01AA            |
| Organic nitrate                                                               | C01DA            |
| Other vasodilators used in cardiac diseases                                   | C01DX            |
| <b>Chronic, stable heart failure</b>                                          |                  |
| High-ceiling diuretics                                                        | C03C             |
| <b>Migraine</b>                                                               |                  |
| Triptan                                                                       | N02C             |
| <b>Adrenal disease</b>                                                        |                  |
| Phentolamine                                                                  | C04AB01          |
| Tolazoline                                                                    | C04AB02          |
| Anticorticosteroids                                                           | H02CA            |

---

|                                                         |                     |
|---------------------------------------------------------|---------------------|
| Mifepristone                                            | G03XB               |
| Metoprolol                                              | V04CD               |
| <b>Hyperparathyroidism</b>                              |                     |
| Calcium, combinations with vitamin D and/or other drugs | A12AX               |
| Vitamin D and analogues                                 | A11CC               |
| <b>Thyroid problems</b>                                 |                     |
| Thyroid hormones                                        | H03AA               |
| <b>Diabetes</b>                                         |                     |
| Blood glucose lowering drugs                            | A10                 |
| <b>Rheumatoid arthritis</b>                             |                     |
| Methotrexate                                            | L04AX03             |
| Sulfasalazine                                           | A07EC01             |
| Leflunomide                                             | L04AA13             |
| Etanercept                                              | L04AB01             |
| Infliximab                                              | L04AB02             |
| Adalimumab                                              | L04AB04             |
| Golimumab                                               | L04AB06             |
| Abatacept                                               | L04AA24             |
| Anakinra                                                | L04AC03             |
| Tocilizumab                                             | L04AC07             |
| <b>Asthma / COPD</b>                                    |                     |
| Inhaled steroids                                        | R03BA, R03AK, R03AL |

---

**Supplemental table S3.** Incidence rate/1000 person-years of acute CDT for anti-hypertensive monotherapies within 5 years, 10 years, 15 years, 20 years and 25 years

| Follow-up year    | ACEIs | ARBs  | BBs    | CCBs  | Thiazides |
|-------------------|-------|-------|--------|-------|-----------|
| 5-year            |       |       |        |       |           |
| Cumulative events | 591   | 187   | 854    | 237   | 492       |
| Person years      | 27435 | 10404 | 56076  | 11132 | 27815     |
| Incidence rate    | 21.5  | 18.0  | 15.2   | 21.3  | 17.7      |
| 10-year           |       |       |        |       |           |
| Cumulative events | 966   | 347   | 1540   | 352   | 903       |
| Person years      | 39740 | 15801 | 88490  | 14955 | 42957     |
| Incidence rate    | 24.3  | 22.0  | 17.4   | 23.5  | 21.0      |
| 15-year           |       |       |        |       |           |
| Cumulative events | 1127  | 405   | 1905   | 397   | 1077      |
| Person years      | 44820 | 18237 | 105441 | 16542 | 49325     |
| Incidence rate    | 25.1  | 22.2  | 18.1   | 24.0  | 21.8      |
| 20-year           |       |       |        |       |           |
| Cumulative events | 1175  | 423   | 2032   | 413   | 1122      |
| Person years      | 46493 | 18924 | 111911 | 17154 | 50907     |
| Incidence rate    | 25.3  | 22.4  | 18.2   | 24.1  | 22.0      |
| 25-year           |       |       |        |       |           |
| Cumulative events | 1183  | 425   | 2052   | 420   | 1125      |
| Person years      | 46675 | 18964 | 112726 | 17222 | 51022     |
| Incidence rate    | 25.3  | 22.4  | 18.2   | 24.4  | 22.0      |

**Supplemental table S4.** Number needed to treat for thiazides monotherapy compared with BBs monotherapy to prevent acute CDT in all patients and subgroups.

|                                | NNT (95% CI)      |                   |                  |                 |                 |
|--------------------------------|-------------------|-------------------|------------------|-----------------|-----------------|
|                                | 5-year            | 10-year           | 15-year          | 20-year         | 25-year         |
| All patients                   | 102 (100 to 100)  | 49 (33 to 100)    | 34 (25 to 50)    | 29 (17 to 100)  | 26 (14 to Inf)  |
| Gender                         |                   |                   |                  |                 |                 |
| Male                           | 71 (50 to 100)    | 34 (25 to 100)    | 25 (14 to 50)    | 21 (11 to 100)  | 21 (11 to Inf)  |
| Female                         | 143 (100 to Inf)  | 67 (50 to 100)    | 47 (25 to 100)   | 38 (20 to Inf)  | 34 (-50 to 14)  |
| Age(years)                     |                   |                   |                  |                 |                 |
| 18-39                          | 720 (-Inf to 100) | 278 (-100 to 100) | 156 (-100 to 33) | 107 (-50 to 25) | 93 (-25 to 14)  |
| 40-69                          | 98 (100 to 100)   | 45 (33 to 100)    | 31 (20 to 50)    | 25 (17 to 50)   | 23 (-Inf to 11) |
| ≥70                            | 52 (33 to Inf)    | 27 (14 to Inf)    | 22 (-100 to 10)  | 21 (-25 to 7)   | 21 (-13 to 6)   |
| Drugs for diabetes             |                   |                   |                  |                 |                 |
| Yes                            | 12 (9 to 20)      | 8 (6 to 13)       | 7 (5 to 11)      | 6 (4 to 10)     | 4 (-13 to 2)    |
| No                             | 135 (100 to Inf)  | 63 (50 to 100)    | 44 (25 to 100)   | 37 (20 to 100)  | 34 (-100 to 14) |
| Drugs for rheumatoid arthritis |                   |                   |                  |                 |                 |
| Yes                            | 11 (7 to 33)      | 6 (3 to 17)       | 6 (3 to 17)      | 3 (-3 to 1)     | 3 (-3 to 1)     |
| No                             | 107 (100 to 100)  | 51 (33 to 100)    | 36 (25 to 100)   | 30 (20 to 100)  | 28 (-Inf to 14) |
| Drugs for asthma/COPD          |                   |                   |                  |                 |                 |
| Yes                            | 114 (-100 to 33)  | 60 (-50 to 20)    | 46 (-33 to 14)   | 38 (-17 to 9)   | 38 (-17 to 9)   |
| No                             | 101 (100 to 100)  | 48 (33 to 100)    | 34 (25 to 50)    | 28 (17 to 100)  | 26 (13 to Inf)  |
| Calendar years                 |                   |                   |                  |                 |                 |
| 1996-2000                      | 140 (-100 to 50)  | 70 (-50 to 20)    | 53 (-33 to 17)   | 45 (-25 to 13)  | 43 (-25 to 11)  |
| 2000-2010                      | 69 (50 to 100)    | 35 (25 to 50)     | 26 (20 to 50)    | 23 (14 to 50)   | 22 (14 to 50)   |
| 2010-2020                      | 354 (-Inf to 100) | 171 (-100 to 50)  | 149 (-50 to 33)  | 149 (-50 to 33) | 149 (-50 to 33) |

## Supplemental figures legend

**Supplemental figure 1.** Incidence rate/1000 person-years of acute CDT for anti-hypertensive monotherapies of 25 years

**Supplemental figure 2.** Forest plot of subgroup hazard ratios between thiazides and BBs after IPW

**Supplemental figure 3.** NNT (number needed to treat) for thiazides compared with BBs during 25 years in subgroups

Incidence rate/1000 person-years

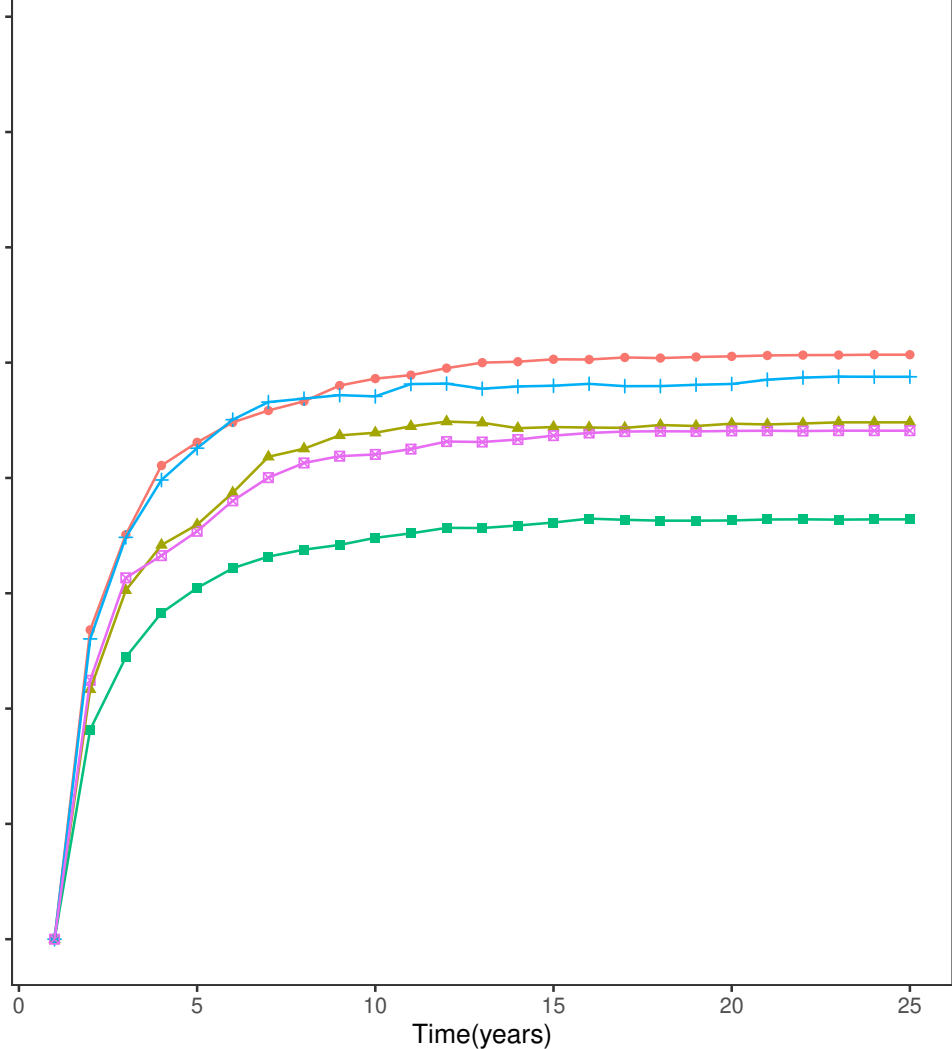

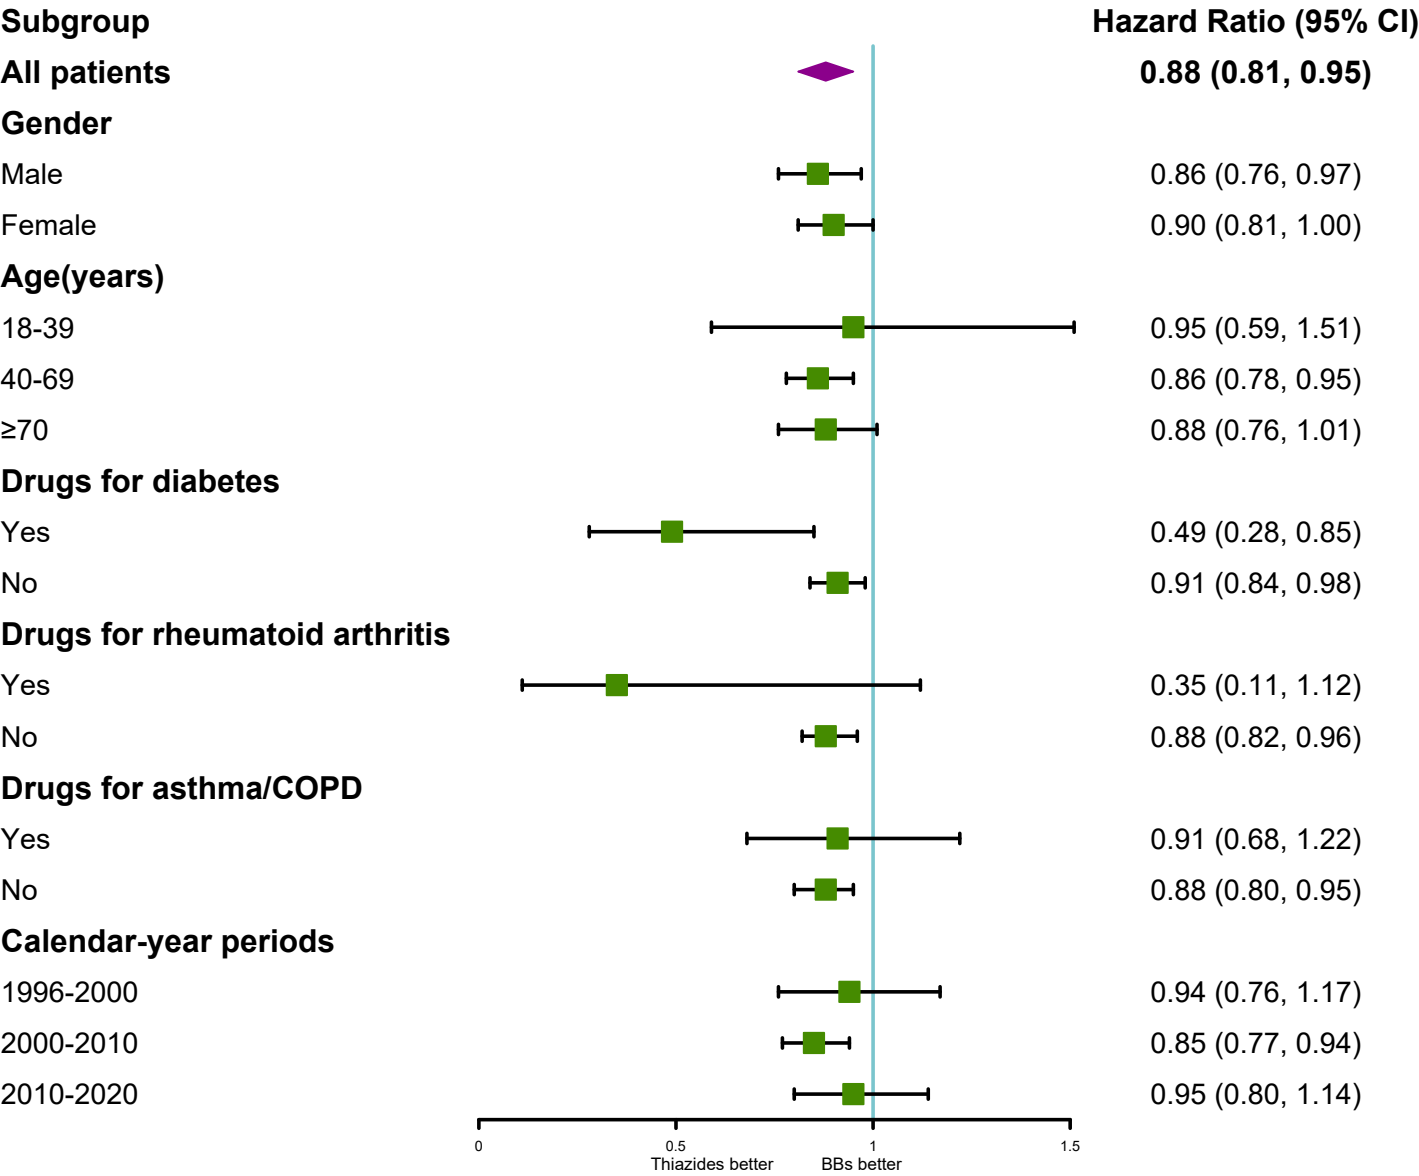



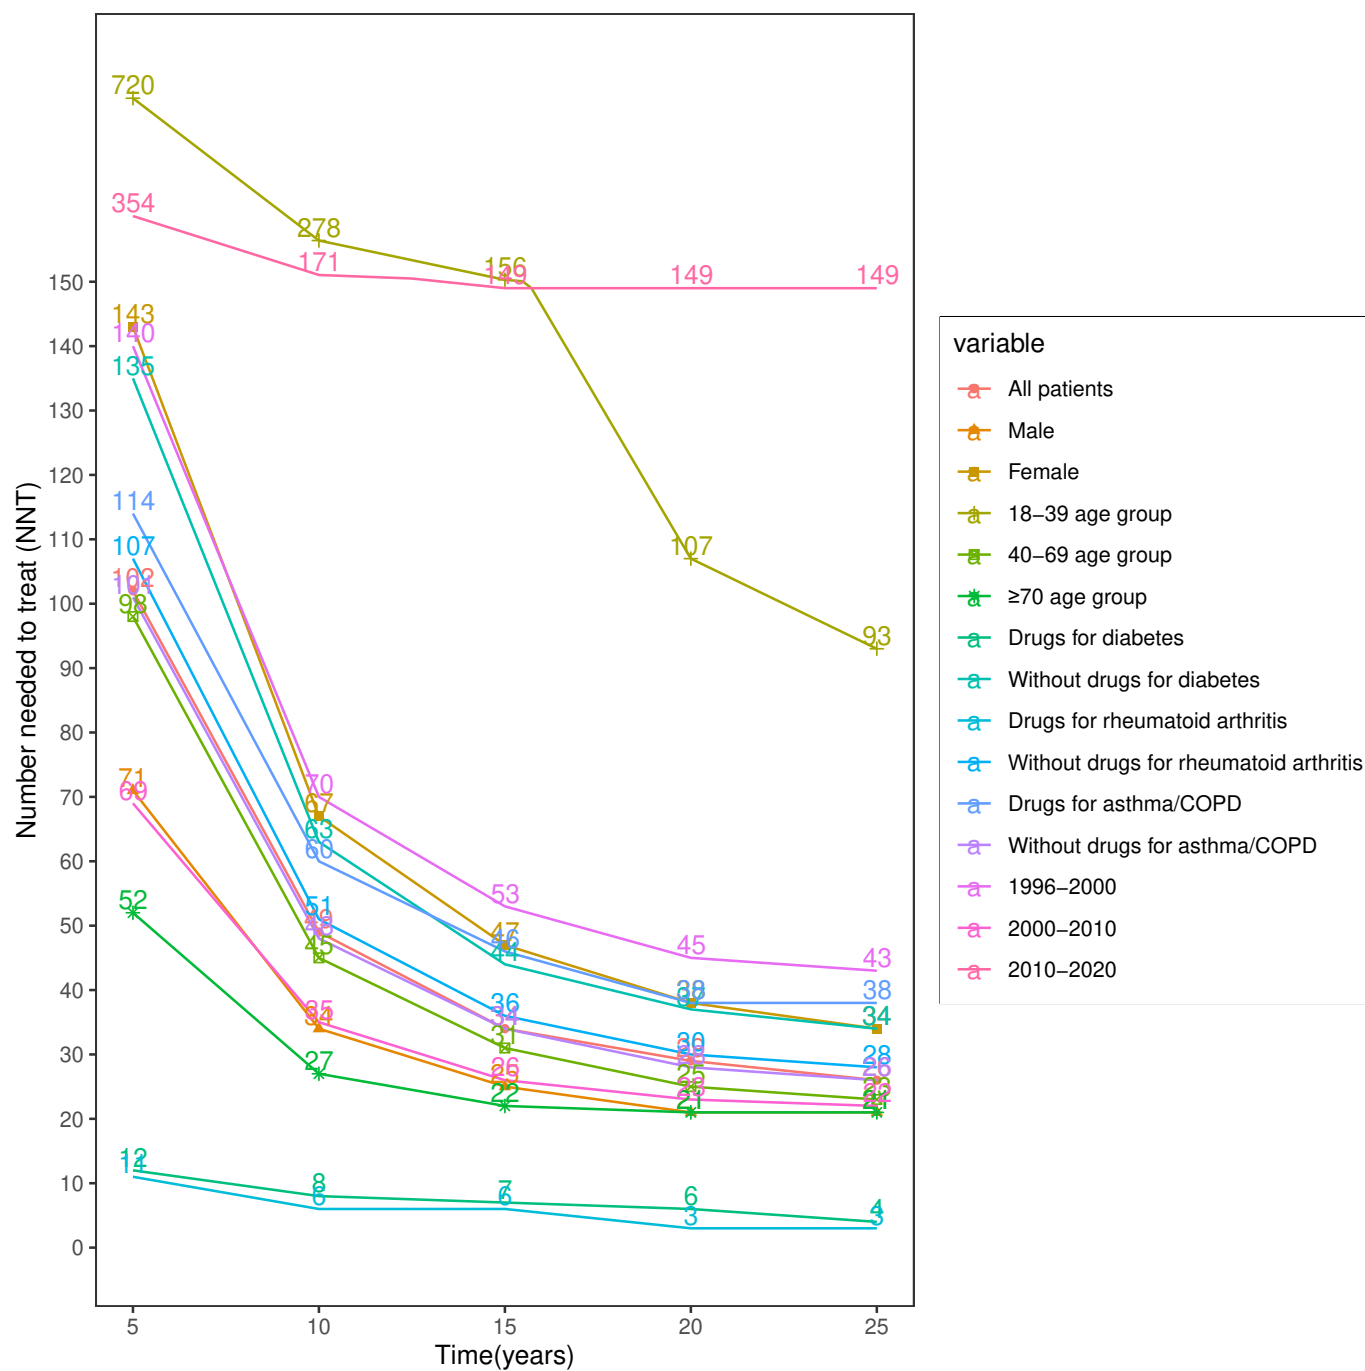

Supplement: bmjopen-2022-068721supp001_data_supplement.pdf [file bmjopen-2022-068721supp001_data_supplement.pdf]
